# Supplementary material for: Continuous Kidney Replacement Therapy Practices in Pediatric Intensive Care Units Across Europe
Source: PubMed Central journal article supplement (PMC9856326; doi:10.1001/jamanetworkopen.2022.46901), 2022-12-15
Supplement: jamanetwopen-e2246901-s003.pdf [file jamanetwopen-e2246901-s003.pdf]

## Data Sharing Statement

Daverio. Continuous Kidney Replacement Therapy Practices in Pediatric Intensive Care Units Across Europe. *JAMA Netw Open*. Published December 15, 2022.

doi:10.1001/jamanetworkopen.2022.46901

### Data

**Data available:** Yes

**Data types:** Data (not involving human participants)

**How to access data:** [marco.daverio.va@gmail.com](mailto:marco.daverio.va@gmail.com)

**When available:** With publication

### Supporting Documents

**Document types:** None

### Additional Information

**Who can access the data:** researchers whose proposed use of the data has been approved

**Types of analyses:** For a specific purpose

**Mechanisms of data availability:** after approval of a proposal
